# Supplementary material for: Targeted treatment of chondrosarcoma with a bacteriophage-based particle delivering a secreted tumor necrosis factor-related apoptosis-inducing ligand
Source: PubMed Central journal article supplement (PMC11090904; doi:10.1016/j.omton.2024.200805), 2024-04-24
Supplement: mmc1.pdf [file mmc1.pdf]

**Supplemental information**

**Targeted treatment of chondrosarcoma  
with a bacteriophage-based particle delivering  
a secreted tumor necrosis factor-related  
apoptosis-inducing ligand**

**Aitthiphon Chongchai, Kaoutar Bentayebi, Grace Chu, Wenqing Yan, Sajee Waramit, Thanyaluck Phitak, Prachya Kongtawelert, Peraphan Pothacharoen, Keittisak Suwan, and Amin Hajitou**

**Table S1. Primer sequences for RT-qPCR**

| Gene                   | Primers (5'→3')                            |
|------------------------|--------------------------------------------|
| <i>Human sTRAIL</i>    | Forward: <i>CCAGAGGAAGAAGCAACACA</i>       |
|                        | Reverse: <i>GAATAGATGTAGTAAAACCCTTTTCA</i> |
| <i>Human Caspase 3</i> | Forward: <i>TGGTTCATCCAGTCGCTTTG</i>       |
|                        | Reverse: <i>CATTCTGTTGCCACCTTTCG</i>       |
| <i>Human Caspase 8</i> | Forward: <i>GCCTCCCTCAAGTTCCT</i>          |
|                        | Reverse: <i>CCTGGAGTCTCTGGAATAACA</i>      |
| <i>Human XIAP</i>      | Forward: <i>AACCTTGTGATCGTGCCT</i>         |
|                        | Reverse: <i>ACCCTGGATACCATTTAGC</i>        |
| <i>Human cFLIP</i>     | Forward: <i>GCTACCATCCCTGTACCTG</i>        |
|                        | Reverse: <i>CAGGAGTGGGCGTTTTCT</i>         |
| <i>Human GAPDH</i>     | Forward: <i>CCCCTTCATTGACCTCAACTAC</i>     |
|                        | Reverse: <i>GATGACAAGCTTCCCGTTCTC</i>      |
| <i>Human ACTB</i>      | Forward: <i>CACCATTGGCAATGAGCGGTTTC</i>    |
|                        | Reverse: <i>AGGTCTTTGCGGATGTCCACGT</i>     |
| <i>Mouse ACTB</i>      | Forward: <i>CATTGCTGACAGGATGCAGAAGG</i>    |
|                        | Reverse: <i>TGCTGGAAGGTGGACAGTGAGG</i>     |

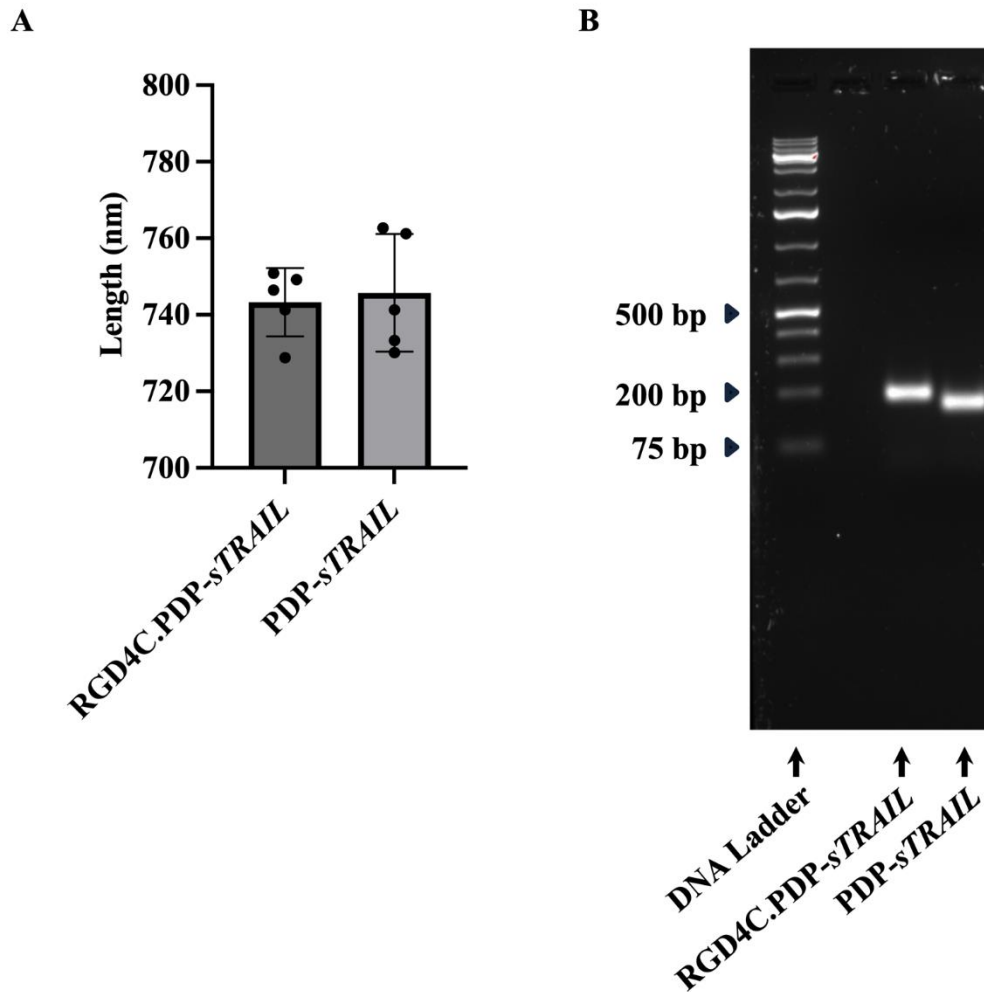

**Figure S1.** Physical characterisation of the vectors. **A)** Comparison of particle length of targeted RGD4C.PDP-*sTRAIL* and non-targeted PDP-*sTRAIL* using images from the transmission electron micrographs. The measurements were done using ImageJ software.

**B)** Agarose gel electrophoresis depicting the PCR products of the amplified pIII gene region containing the insertion site of the RGD4C ligand. The targeted RGD4C.PDP-*sTRAIL* carrying the RGD4C-encoding DNA sequence yields a larger PCR product (200 bps) than the non-targeted PDP-*sTRAIL* vector (173 bps).

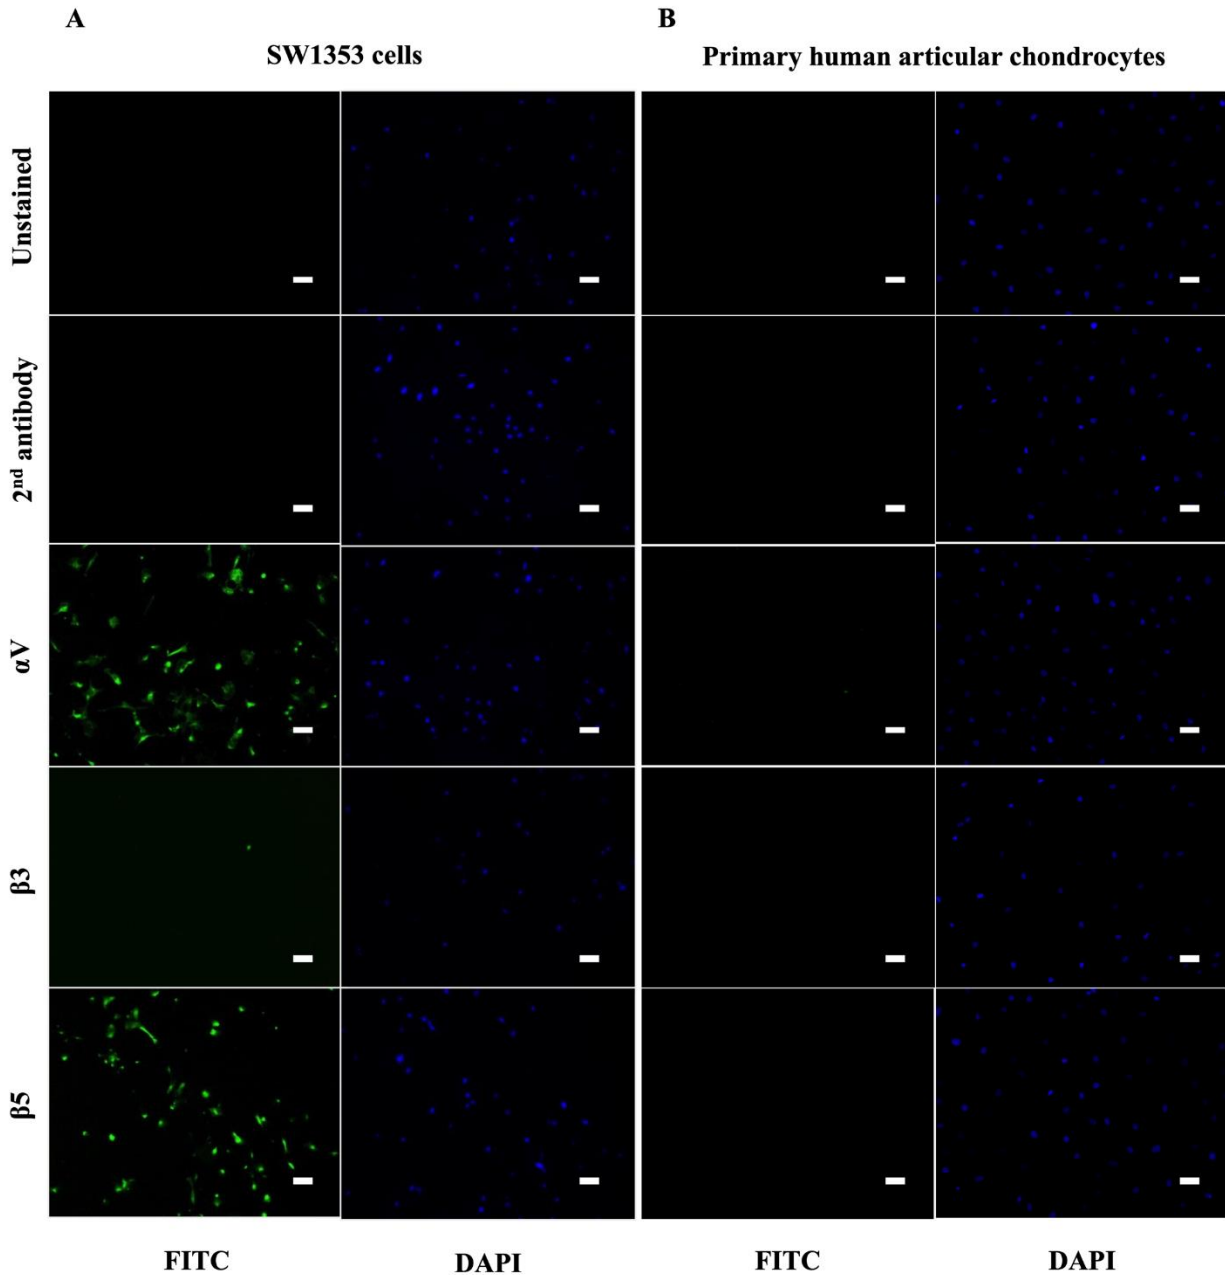

**Figure S2.** Immunofluorescent staining of  $\alpha V$ ,  $\beta 3$ , and  $\beta 5$  integrins. **A)** Human chondrosarcoma SW1353 cells. **B)** Primary human articular chondrocytes. Cells were observed under a fluorescence microscope (10x) and analysed using ImageJ software. Cells treated with the secondary antibody alone or unstained cells served as controls. FITC (fluorescein isothiocyanate): integrin staining. Blue: DAPI (4',6-diamidino-2-phenylindole), nuclear staining. Scale bar, 160  $\mu m$ .

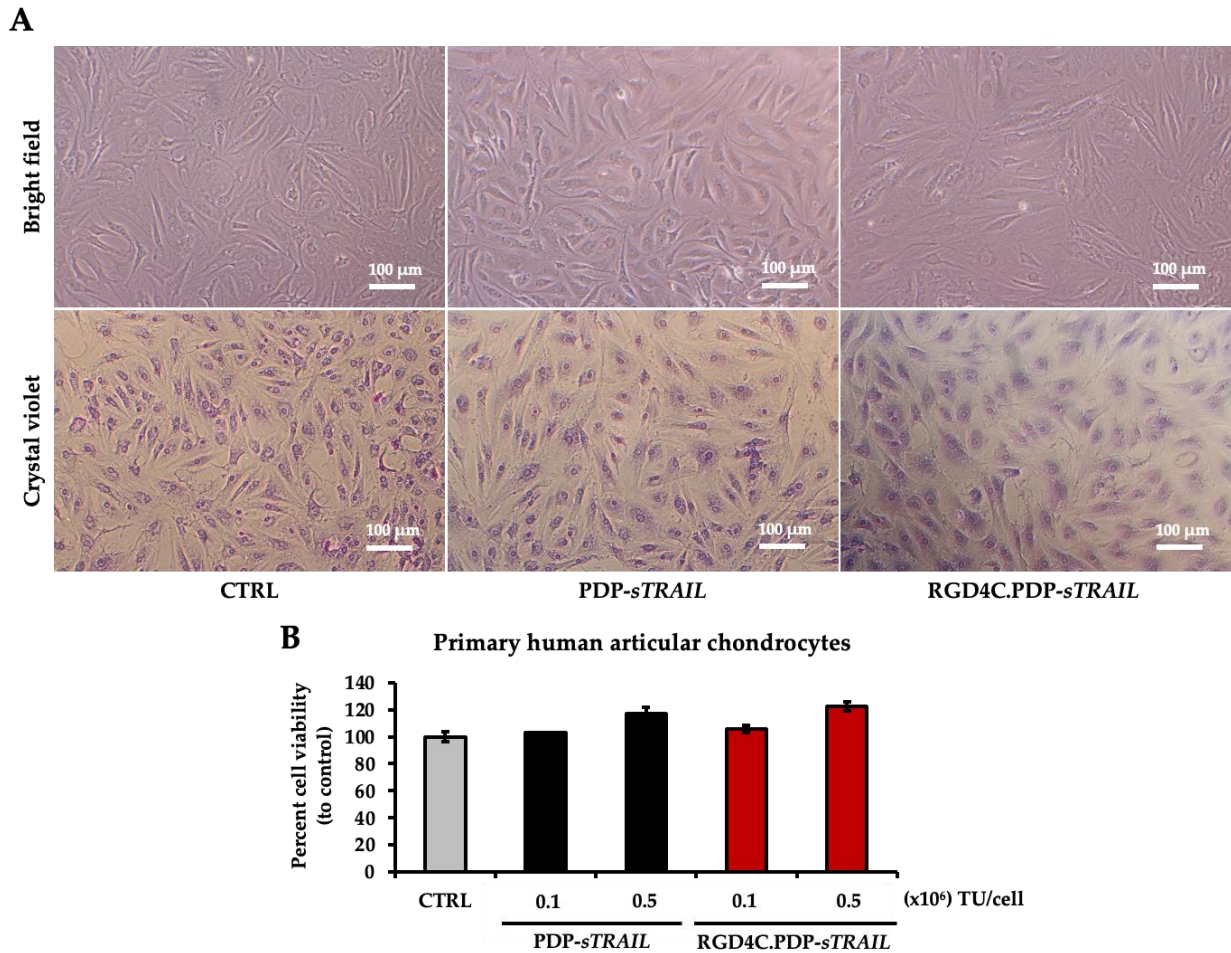

**Figure S3.** Evaluation of cell death in normal human articular chondrocytes upon exposure to targeted RGD4C.PDP-*sTRAIL* or non-targeted PDP-*sTRAIL*. **(A)** Phase contrast images showing normal morphology at day 7 post-transduction. **(B)** Evaluation of cell viability of the chondrocytes using CellTiter-Glo® Luminescent Cell Viability Assay. All results are shown as mean ± SEM of triplicate wells of one representative experiment and compared to PDP-*sTRAIL* treatment group.

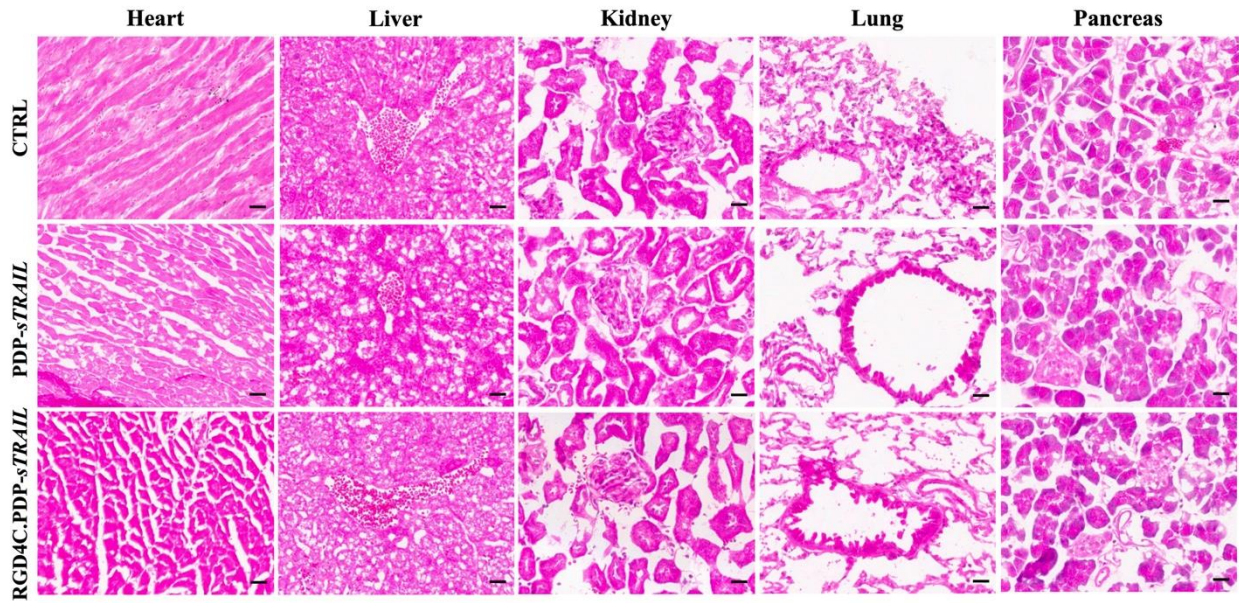

**Figure S4.** Microscopic imaging of H&E-stained sections of normal organs following treatment with targeted RGD4C.PDP-*sTRAIL* or non-targeted PDP-*sTRAIL*. Organs from control untreated mice (CTRL) were also stained with H&E. Scale bar, 20  $\mu$ m.
